apnea screening tool and postanesthesia care assessment.  
ANESTHESIOLOGY 2009; 110:869–77

(Accepted for publication February 16, 2015.)

## Prehabilitation versus Rehabilitation

To the Editor:

We read with a great interest the article of Gillis *et al.*<sup>1</sup> In this study, 77 patients undergoing colorectal resection for cancer were randomized to receive either prehabilitation or rehabilitation. Prehabilitation group was able to walk significantly further in 6 min, showing that a prehabilitation program could improve postoperative functional exercise capacity.

Rigorously, the authors scheduled in the study design to measure patients' compliance to the postoperative rehabilitation program. This program was based on exercise, nutrition, and psychological interventions. It was reported in the study that the compliance to this trimodal rehabilitation program from surgery to 4-week period was significantly higher in the prehabilitation group than in the rehabilitation group (53 vs. 31%, respectively,  $P < 0.001$ ). As a result, we could hypothesize that the enhance in exercise capacity observed in the prehabilitation group could be the result of a greater compliance to the postoperative program rather than the usefulness of a prehabilitation program.

We would like to know how the authors dealt with this problem.

### Competing Interests

The authors declare no competing interests.

**Julien Bordes, M.D., Mickaël Cardinal, M.D., Eric Kaiser, M.D.** Sainte Anne Military Teaching Hospital, Toulon, France (J.B.). [bordes.julien@neuf.fr](mailto:bordes.julien@neuf.fr)

### Reference

1. Gillis C, Li C, Lee L, Awasthi R, Augustin B, Gamsa A, Liberman AS, Stein B, Charlebois P, Feldman LS, Carli F: Prehabilitation versus rehabilitation: A randomized control trial in patients undergoing colorectal resection for cancer. ANESTHESIOLOGY 2014; 121:937–47

(Accepted for publication February 21, 2015.)

In Reply:

We thank Bordes *et al.* for the opportunity to clarify this point. Our results<sup>1</sup> indicate that the compliance to the trimodal program in the first 4 weeks postsurgery was significantly higher in the prehabilitation group than in the

rehabilitation group (53 vs. 31% respectively,  $P < 0.001$ ). Bordes *et al.* thus hypothesized that the observed improvement in functional walking capacity in the prehabilitation group could be the result of a greater compliance to the postoperative program rather than the usefulness of a prehabilitation program.

We would argue that the usefulness of the prehabilitation program is directly linked to the ability to maintain compliance postoperatively. Our argument is based on two main points: (1) Prehabilitation maintains functional integrity so that patients are physically capable of complying with the trimodal program postoperatively; and (2) Prehabilitation is rooted in the belief that the preoperative period is an opportune time to encourage compliance by educating and preparing patients for the tasks that need to be completed in the postoperative period.

The prehabilitated patients gained, on average, +25.2 m (50.2 m) in functional walking distance before surgery; a mean difference of distance walked of approximately 40 m between groups. This preoperative difference was considered clinically and statistically significant ( $P < 0.001$ ) and substantiates the impact of prehabilitation. The finding attests to successful attainment of a “buffer” (*i.e.*, reserve) against the expected decline in physical function and overall well-being that is typically observed postoperatively. Moreover, a number of investigations have identified preoperative physical fitness as a predictor of surgical complications and early convalescence.<sup>2–6</sup>

Compliance was tabulated subjectively, based on adherence to the *entire* trimodal program. The value reported is an equally weighted average among all three interventions, as prehabilitation is believed to be a work of synergy. It should be noted that the self-reported physical activity, as measured using the validated CHAMPS questionnaire, 4 weeks after surgery was not significantly different between the two groups. This implies that prehabilitated patients were more compliant with the nutrition and psychological component, rather than the exercise component, of the trimodal intervention after surgery. Although anxiety reduction strategies likely contributed to overall well-being, there is no direct link between these techniques and improvement in functional capacity. Similarly, maintenance of adequate dietary protein is essential to preserve lean body mass and therefore skeletal muscle function; however, it is generally accepted that exercise is the main anabolic stimulus and that adequate nutrition augments the effect.<sup>7–9</sup> Adherence to the nutrition intervention after surgery may have been useful in sustaining the functional gain achieved in the preoperative period, yet unlikely to stimulate anabolic gains independent of increased exercise.

Finally, the use of preoperative counseling to provide information on the expectations of surgical procedures is believed to reduce fear and anxiety and enhance postoperative recovery.<sup>10,11</sup> It is a fundamental component of Enhanced Recovery Programs.<sup>11</sup> Preoperative instruction

that focuses on the tasks expected of the patient during the perioperative period is also believed to improve adherence to the guidelines and thus improve recovery.<sup>11–13</sup> Prehabilitation can be perceived similarly. It is likely that patients who begin and establish a routine preoperatively find it easier to continue the routine postoperatively. Indeed, it has been found that intention increases rates of goal achievement, *only* in the absence of strong antagonistic habits.<sup>14</sup> The preoperative period thus allows time to identify barriers<sup>15</sup> and counterproductive habits early, which enables later adherence.

In conclusion, we would argue that the ability of the prehabilitation group to comply with the trimodal program earlier than the rehabilitation group after surgery simply suggests that prehabilitation was implemented successfully.

### Competing Interests

The authors declare no competing interests.

**Chelsia Gillis, R.D., M.Sc., Liane S. Feldman, M.D., Ann Gamsa, Ph.D., Francesco Carli, M.D., M.Phil.** McGill University, Montreal, Quebec, Canada (F.C.). franco.carli@mcgill.ca

### References

- Gillis C, Li C, Lee L, Awasthi R, Augustin B, Gamsa A, Liberman AS, Stein B, Charlebois P, Feldman LS, Carli F: Prehabilitation *versus* rehabilitation: A randomized control trial in patients undergoing colorectal resection for cancer. *ANESTHESIOLOGY* 2014; 121:937–47
- Li C, Carli F, Lee L, Charlebois P, Stein B, Liberman AS, Kaneva P, Augustin B, Wongyingsinn M, Gamsa A, Kim do J, Vassiliou MC, Feldman LS: Impact of a trimodal prehabilitation program on functional recovery after colorectal cancer surgery: A pilot study. *Surg Endosc* 2013; 27:1072–82
- Mayo NE, Feldman L, Scott S, Zavorsky G, Kim do J, Charlebois P, Stein B, Carli F: Impact of preoperative change in physical function on postoperative recovery: Argument supporting prehabilitation for colorectal surgery. *Surgery* 2011; 150:505–14
- Cohen ME, Bilimoria KY, Ko CY, Hall BL: Development of an American College of Surgeons National Surgery Quality Improvement Program: Morbidity and mortality risk calculator for colorectal surgery. *J Am Coll Surg* 2009; 208:1009–16
- Snowden CP, Prentis JM, Anderson HL, Roberts DR, Randles D, Renton M, Manas DM: Submaximal cardiopulmonary exercise testing predicts complications and hospital length of stay in patients undergoing major elective surgery. *Ann Surg* 2010; 251:535–41
- Wilson RJ, Davies S, Yates D, Redman J, Stone M: Impaired functional capacity is associated with all-cause mortality after major elective intra-abdominal surgery. *Br J Anaesth* 2010; 105:297–303
- Ferrando AA, Paddon-Jones D, Hays NP, Kortebein P, Ronsen O, Williams RH, McComb A, Symons TB, Wolfe RR, Evans W: EAA supplementation to increase nitrogen intake improves muscle function during bed rest in the elderly. *Clin Nutr* 2010; 29:18–23
- Burd NA, Tang JE, Moore DR, Phillips SM: Exercise training and protein metabolism: Influences of contraction, protein intake, and sex-based differences. *J Appl Physiol* (1985) 2009; 106:1692–701
- Moore DR, Tang JE, Burd NA, Rerечich T, Tarnopolsky MA, Phillips SM: Differential stimulation of myofibrillar and sarcoplasmic protein synthesis with protein ingestion at rest and after resistance exercise. *J Physiol* 2009; 587(Pt 4):897–904
- Kiecolt-Glaser JK, Page GG, Marucha PT, MacCallum RC, Glaser R: Psychological influences on surgical recovery. Perspectives from psychoneuroimmunology. *Am Psychol* 1998; 53:1209–18
- Lassen K, Soop M, Nygren J, Cox PB, Hendry PO, Spies C, von Meyenfeldt MF, Fearon KC, Revhaug A, Norderval S, Ljungqvist O, Lobo DN, Dejong CH; Enhanced Recovery After Surgery (ERAS) Group: Consensus review of optimal perioperative care in colorectal surgery: Enhanced Recovery After Surgery (ERAS) Group recommendations. *Arch Surg* 2009; 144:961–9
- Clarke HD, Timm VL, Goldberg BR, Hattrup SJ: Preoperative patient education reduces in-hospital falls after total knee arthroplasty. *Clin Orthop Relat Res* 2012; 470:244–9
- Blay N, Donoghue J: The effect of pre-admission education on domiciliary recovery following laparoscopic cholecystectomy. *Aust J Adv Nurs* 2005; 22:14–19
- Webb TL, Sheeran P, Luszczynska A: Planning to break unwanted habits: Habit strength moderates implementation intention effects on behaviour change. *Br J Soc Psychol* 2009; 48(Pt 3):507–23
- McArthur D, Dumas A, Woodend K, Beach S, Stacey D: Factors influencing adherence to regular exercise in middle-aged women: A qualitative study to inform clinical practice. *BMC Womens Health* 2014; 14:49

(Accepted for publication February 21, 2015.)

## Effect of Thoracic Epidural Anesthesia on the Tolerance to Acute Normovolemic Anemia: Issues Warranting Comment

### To the Editor:

I read with great interest the article by Pape *et al.*<sup>1</sup> in which the authors assessed the effect of sympathetic nerve blockade induced by thoracic epidural anesthesia (TEA) with ropivacaine on the tolerance of anesthetized pigs to acute normovolemic anemia (ANA). The authors made this assessment from a determination of the hemoglobin at which whole-body oxygen consumption ( $\dot{V}O_2$ ) demonstrated supply dependency and decreased from the baseline value, the so-called critical hemoglobin ( $Hb_{crit}$ ). Whole-body  $\dot{V}O_2$  was calculated from the product of cardiac output, determined by thermodilution, and the difference in oxygen content of arterial and mixed venous blood samples. The authors found that the  $Hb_{crit}$  ( $2.5 \pm 0.6$  g/dl) was identical with and without TEA.

There are two issues pertaining to this study warranting comment. The first issue relates to the limitation inherent in using a systemic index of oxygen supply and demand. Although the authors acknowledge this fundamental shortcoming, it deserves to be underscored and more thoroughly discussed. Because the index represents an aggregate of the responses in the individual body tissues, it provides no organ-specific information. A constancy of whole-body  $\dot{V}O_2$  during ANA either alone or
